# Supplementary material
Source: MDPI journal article supplement (https://www.mdpi.com/2073-4344/12/7/775)
Supplement: s1 [file s1]

---

## **Supplementary Materials**

### **Excellent catalytic performance of Ce-MOF with abundant oxygen vacancies supported noble metal Pt in the oxidation of toluene**

Yang Liu<sup>1</sup>, Gongda Chen<sup>2</sup>, Jianjun Chen<sup>3</sup>, Hejingying Niu<sup>1,\*</sup>

<sup>1</sup>School of Environmental & Chemical Engineering, Shanghai University, Shanghai 200444, China

<sup>2</sup>Energy Group Science and Technology Research Institut, Guangzhou, 510407, China

<sup>3</sup>School of environmental and chemical engineering, Tsinghua University, Beijing, 100084, China

\*Corresponding author: HeJingying Niu (e-mial: niuhjy@shu.edu.cn)

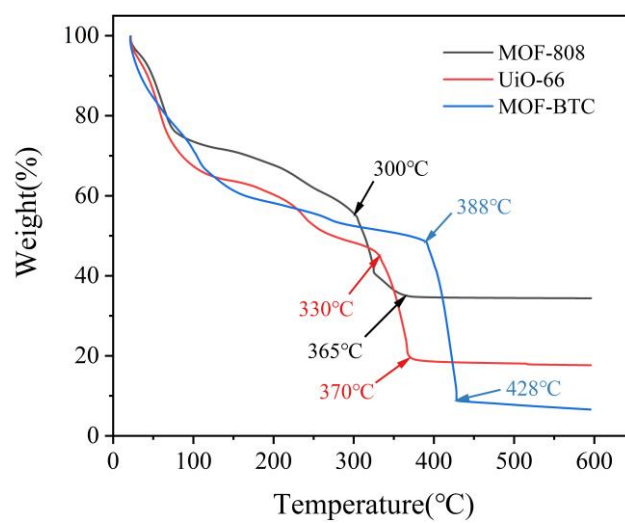

**Figure S1.** The TGA plots of MOF-808, UiO-66 and MOF-BTC.

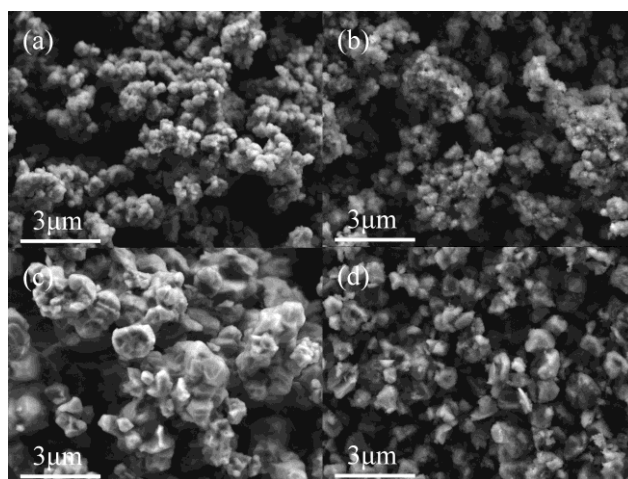

**Figure S2.** The SEM images (a) of MOF-808, images (b) of Pt/MOF-808, images (c) of UiO-66 and images (d) of Pt/UiO-66.

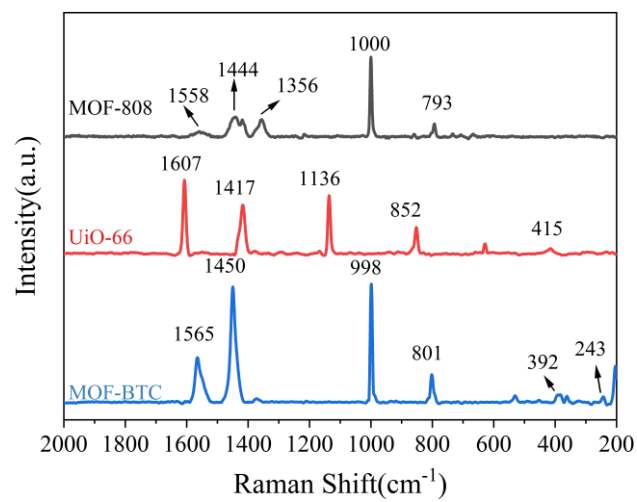

**Figure S3.** Raman spectra of MOF-808, UiO-66 and MOF-BTC. (The laser wavelength =514 nm.)

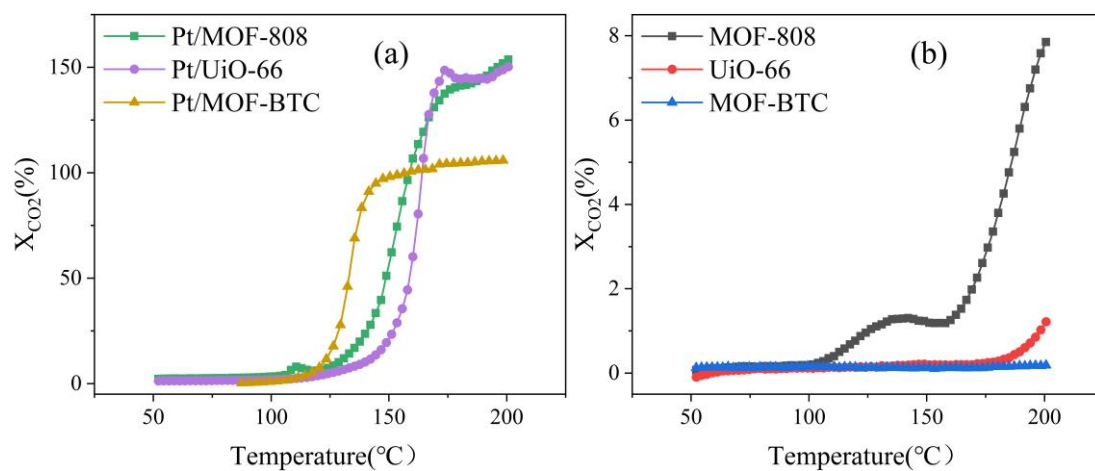

**Figure S4.** The CO<sub>2</sub> selectivity of different catalysts in the oxidation of toluene. (The total flow rate was 50 ml/min with the weight hourly space velocity WHSV=30,000 mL/g/h and the toluene concentration was 500 ppm)

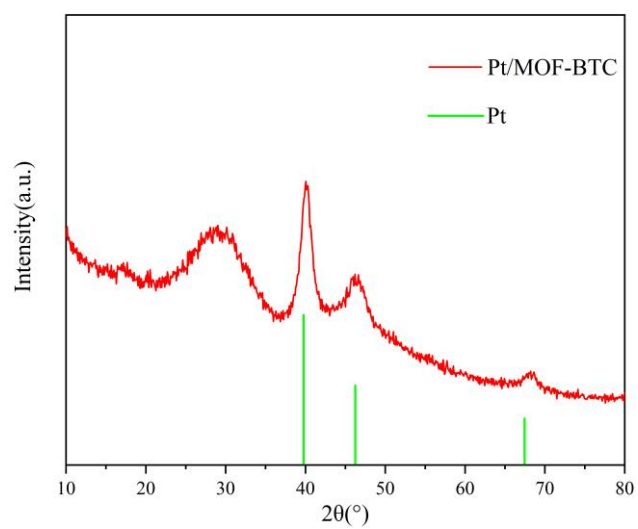

**Figure S5.** The XRD pattern of Pt/MOF-BTC after toluene oxidation

**Table S1.** The position and FWHM of Ce over different samples

| MOF-808  |      | UiO-66   |      | MOF-BTC  |      | Pt/ MOF-808 |      | Pt/ UiO-66 |      | Pt/ MOF-BTC |      |
|----------|------|----------|------|----------|------|-------------|------|------------|------|-------------|------|
| Position | FWHM | Position | FWHM | Position | FWHM | Position    | FWHM | Position   | FWHM | Position    | FWHM |
| 918.28   | 3.00 | 918.10   | 2.97 | *        | *    | 917.66      | 3.26 | 918.15     | 3.58 | *           | *    |
| 908.2    | 3.79 | 908.40   | 3.44 | 908.09   | 3.71 | 907.81      | 4.06 | 908.70     | 3.60 | 908.01      | 3.14 |
| 904.47   | 4.31 | 904.55   | 4.41 | 904.77   | 4.51 | 904.41      | 4.10 | 904.91     | 4.75 | 904.97      | 4.70 |
| 900.97   | 3.77 | 901.12   | 3.09 | 900.91   | 3.04 | 901.61      | 2.63 | 901.69     | 3.99 | 901.10      | 2.70 |
| 899.06   | 2.55 | 898.90   | 1.93 | *        | *    | 899.31      | 2.68 | 899.48     | 3.45 | *           | *    |
| 889.09   | 4.03 | 889.28   | 4.57 | 888.45   | 4.72 | 889.15      | 4.30 | 889.10     | 4.19 | 888.54      | 3.77 |
| 885.76   | 4.21 | 886.14   | 3.83 | 886.29   | 4.21 | 885.93      | 4.25 | 885.99     | 3.87 | 886.25      | 3.99 |
| 883.11   | 3.21 | 883.26   | 3.50 | 882.65   | 3.00 | 882.70      | 3.19 | 882.99     | 3.10 | 882.82      | 2.81 |

**Table S2.** The position and FWHM of O over different samples

| MOF-808  |      | UiO-66   |      | MOF-BTC  |      | Pt/ UiO-66 |      | Pt/ UiO-66 |      | Pt/ UiO-66 |      |
|----------|------|----------|------|----------|------|------------|------|------------|------|------------|------|
| Position | FWHM | Position | FWHM | Position | FWHM | Position   | FWHM | Position   | FWHM | Position   | FWHM |
| 533.17   | 1.57 | 533.15   | 1.85 | 533.2    | 2.25 | 533.13     | 1.6  | 533.2      | 1.8  | 533.15     | 2.11 |
| 531.68   | 1.66 | 531.7    | 1.64 | 531.68   | 1.67 | 531.64     | 1.66 | 531.7      | 1.73 | 531.63     | 1.61 |
| 529.91   | 1.36 | 530      | 1.17 | *        | *    | 529.89     | 1.34 | 529.86     | 1.06 | *          | *    |

**Table S3.** Comparison of the activities of different Pt-based catalysts for toluene combustion

| Catalysts                         | Pd loading (wt%) | Reaction condition                  | Toluene conversion                            | Ref.      |
|-----------------------------------|------------------|-------------------------------------|-----------------------------------------------|-----------|
| Pt/ZrO <sub>2</sub>               | 1                | 4000mg/m <sup>3</sup> , 30000ml/g/h | T <sub>99</sub> 225°C                         | [1]       |
| Pt/Al <sub>2</sub> O <sub>3</sub> | 1                | 1000 ppm, 36000ml/g/h               | T <sub>50</sub> 189°C; T <sub>100</sub> 225°C | [2]       |
| Pt/Mn <sub>2</sub> O <sub>4</sub> | 1                | 1000 ppm, 30000ml/g/h               | T <sub>50</sub> 172°C; T <sub>90</sub> 183°C  | [3]       |
| Pt/MOF-808                        | 1                | 500 ppm, 30000ml/g/h                | T <sub>50</sub> 154°C; T <sub>90</sub> 178°C  | This work |
| Pt/UiO-66                         | 1                | 500 ppm, 30000ml/g/h                | T <sub>50</sub> 168°C; T <sub>90</sub> 193°C  | This work |
| Pt/MOF-BTC                        | 1                | 500 ppm, 60000ml/g/h                | T <sub>50</sub> 140°C; T <sub>90</sub> 149°C  | This work |

**Table S4.** The position and FWHM of Pt over different samples

| Pt/ MOF-808 |      | Pt/ UiO-66 |      | Pt/ MOF-BTC |      |
|-------------|------|------------|------|-------------|------|
| Position    | FWHM | Position   | FWHM | Position    | FWHM |
| 78.18       | 1.54 | *          | *    | *           | *    |
| 76.12       | 1.81 | 76         | 3.11 | 75.61       | 2.2  |
| 74.86       | 1.44 | 74.86      | 1.44 | 74.64       | 1.25 |
| 72.78       | 1.42 | 72.74      | 1.46 | 72.02       | 1.61 |
| 71.61       | 1.04 | 71.54      | 1.07 | 71.23       | 1.07 |

\* There is no corresponding peak at this position



- 
- [1] Zhang W, Xia S, Chen C, et al. Understanding the crucial roles of catalyst properties in ethyl acetate and toluene oxidation over Pt catalysts [J]. *New Journal Of Chemistry*, 2021, 45, 11352-11358.
- [2] Liotta LF, Ousmane M, Di Carlo G, et al. Catalytic Removal of Toluene over Co<sub>3</sub>O<sub>4</sub>-CeO<sub>2</sub> Mixed Oxide Catalysts: Comparison with Pt/Al<sub>2</sub>O<sub>3</sub> [J]. *Catalysis Letters*, 2009, 127, 270-276.
- [3] Sun Y, Fan J, Cheng H, et al. Investigation into the roles of different oxygen species in toluene oxidation over manganese-supported platinum catalysts [J]. *Molecular Catalysis*, 2021, 507.
